# Supplementary material
Source: publisher site journal article supplement (https://www.spandidos-publications.com/5118/downloadSupplementary)
Supplement: Supplementary file 1 [file downloadSupplementary]

## Sheet: Table S21
Table SXXI. The P-value of DNase genes expression and DNAss.
Cancer type	DNASE1	DNASE1L1	DNASE1L2	DNASE1L3	DNASE2	DNASE2B
ACC	0.2805	0.467087	0.21306	0.52626	0.0273462	0.817771
BLCA	0.0082566	0.845743	8.21002e-07	1.30371e-07	0.145189	0.256966
BRCA	0.283685	0.0114155	0.00906599	5.65655e-06	0.0437116	0.00766087
CESC	0.595494	0.0185955	0.82783	0.00102406	0.341423	0.117388
CHOL	0.10607	0.939699	0.140835	0.216891	0.153826	0.484949
COAD	0.182065	0.000436794	0.0254902	0.482265	0.479239	0.897838
DLBC	0.795469	0.825123	0.00301122	0.000113213	0.0480385	0.00285081
ESCA	0.349275	0.721071	0.0763732	0.119242	0.587596	0.473728
GBM	0.00289764	0.0322691	0.0135126	0.787409	0.024174	0.29717
HNSC	2.63452e-05	0.276902	0.000101013	0.310352	0.00155428	0.0498336
KICH	0.153844	0.0922097	0.296462	0.00443771	0.264839	0.00804059
KIRC	0.773498	0.924707	0.763911	0.345491	0.0145204	0.0175183
KIRP	0.116174	0.856408	0.33671	0.112393	0.457921	0.44028
LAML	0.0242269	0.79854	4.35066e-07	0.109144	0.136937	0.599652
LGG	0.119721	5.6808e-10	0.000120986	0.00274757	0.00237688	0.00606728
LIHC	0.152988	0.36809	0.000731617	0.236941	4.09761e-08	0.0652224
LUAD	0.0044566	0.279749	0.00254552	0.00283554	1.10339e-05	0.00148524
LUSC	0.10635	0.00138966	0.445153	0.107817	0.326122	2.54383e-05
MESO	0.452311	0.201128	0.335071	0.524906	0.226519	0.935296
OV	0.2	0.353571	0.302381	0.963492	0.906349	0.661508
PAAD	0.800406	0.137006	0.490912	0.0423882	0.78068	0.158973
PCPG	0.0126038	0.015295	0.0183534	0.236048	0.00344859	2.71927e-07
PRAD	0.430886	0.23212	0.00159555	0.000947468	4.90832e-06	5.82831e-05
READ	0.151133	0.862556	0.296143	0.395913	0.447613	0.370783
SARC	0.941728	0.605898	0.000194197	1.05348e-06	0.742914	0.138389
SKCM	0.950103	0.000547908	0.151345	0.00246621	0.440133	0.189635
STAD	0.00348064	0.873174	0.194361	0.0127805	0.0362378	0.0854014
TGCT	3.36824e-06	0	0.0252742	2.17831e-08	0.0518078	0.0119459
THCA	0.300483	0.135607	0.85166	1.13604e-06	2.1232e-12	5.5976e-05
THYM	3.60365e-05	2.39792e-06	0.0335081	0.00550674	8.56922e-10	0.195844
UCEC	0.00400308	0.0136205	0.0280704	0.381211	0.446282	0.205071
UCS	0.12133	0.710152	0.000630199	0.419244	0.935427	0.863521
UVM	0.711335	0.00122838	0.135926	0.117478	0.000401097	0.205583
